# Supplementary material for: MPC-Based Prediction of Anti-Mutant Effectiveness of Antibiotic Combinations: In Vitro Model Study with Daptomycin and Gentamicin against Staphylococcus aureus
Source: MDPI journal article supplement (doi:10.3390/antibiotics10101148), 2021-09-23
Supplement: s1 [file s1]

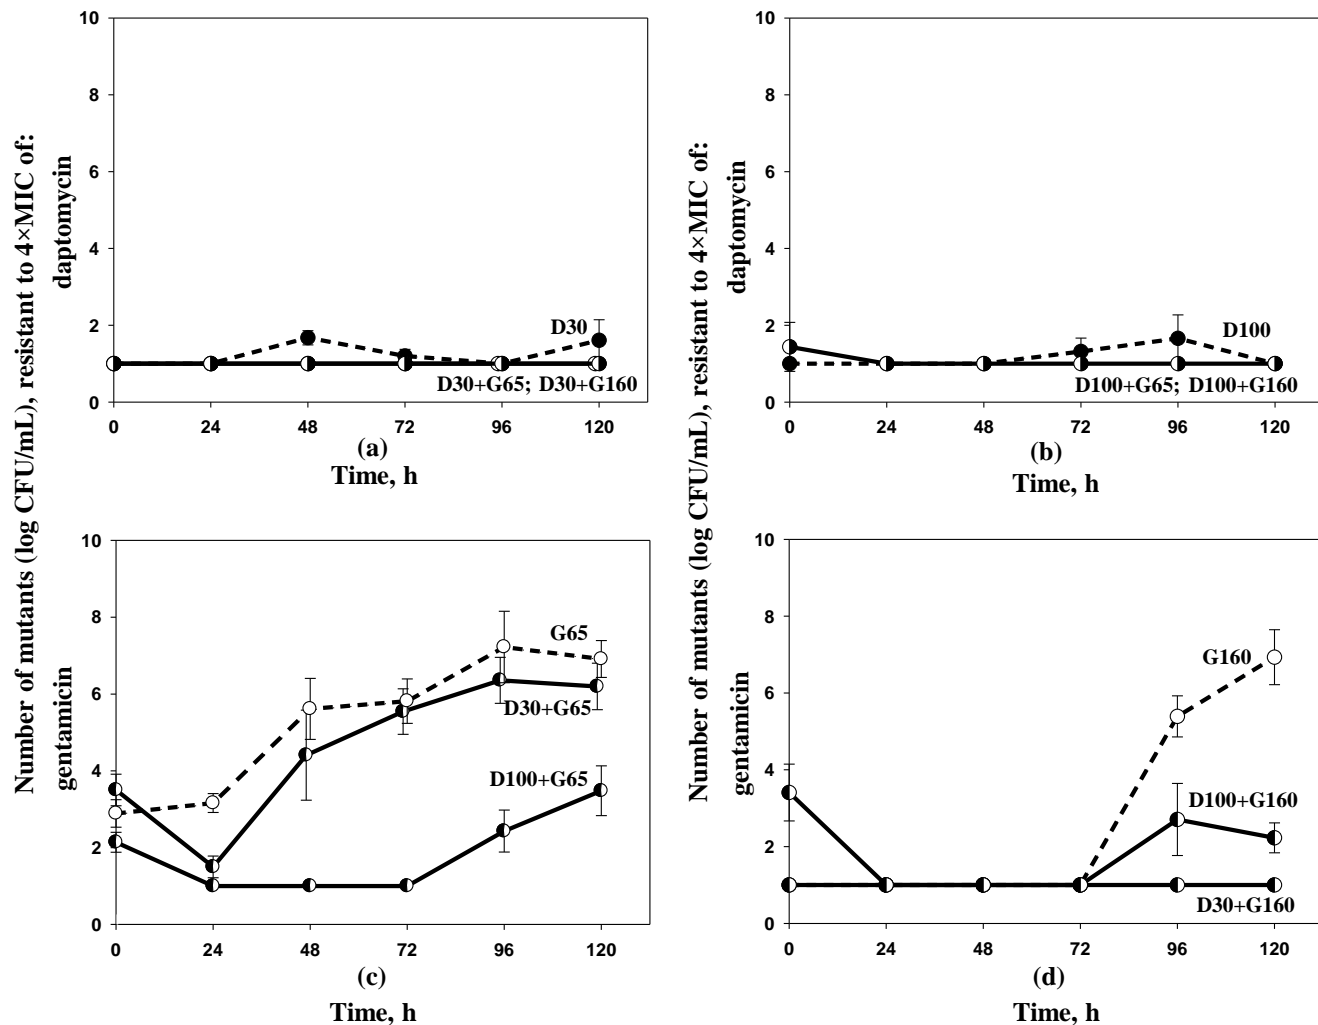

**Fig. S1.** Time courses of subpopulations of *S. aureus* 293 resistant to 4×MIC of daptomycin (a, b) and gentamicin (c, d). Dosing regimens are indicated at each curve. Data are presented as arithmetic means  $\pm$  standard deviations.
